# Supplementary material
Source: PubMed Central journal article supplement (PMC4992593)
Supplement: NIHMS800156-supplement-1.pdf [file NIHMS800156-supplement-1.pdf]

1 **Supplementary Materials**

2 **Figure S1**

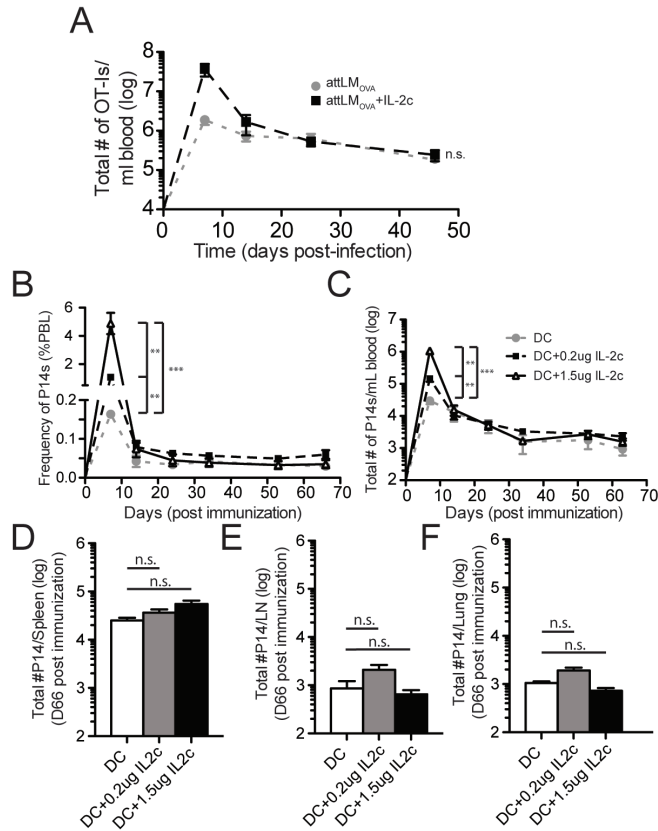

3

4

5 **Figure S1.**  $3 \times 10^4$  Thy1.1<sup>+</sup> WT OT-I cells were adoptively transferred into naïve Thy1.2<sup>+</sup> mice  
6 and infected with  $5 \times 10^7$  CFU attenuated LM-OVA<sub>257</sub> with or without IL-2c treatment from D4-6  
7 post-infection. (A) Total number OT-I cells quantified per mL of blood across 46 days. (B)  
8  $3 \times 10^4$  Thy1.1<sup>+</sup> TCR transgenic P14 cells were adoptively transferred into naïve Thy1.2<sup>+</sup> B6 mice  
9 and subsequently immunized with  $5 \times 10^5$  DC-gp33 followed by Rat Ig, 0.2 $\mu$ g or 1.5 $\mu$ g IL-2c on  
10 D4-6 post-DC immunization. Frequency of P14 cells quantified per mL of blood longitudinally  
11 across 66 days in all treatment groups. (C) Same as (B) except total number of P14 cells  
12 quantified per mL of blood. (D) Summary bar graph (mean  $\pm$  SEM) of total number of P14 cells  
13 harvested from the spleen at D66 post-DC immunization. (E) Same as (D) except total number of  
14 P14 cells in LN. (F) Same as (D) except total number of P14 cells in Lung. Data are  
15 representative of two experiments with at least n=5 mice/group/experiment. \* = p<0.05; \*\* =  
16 p<0.005; \*\*\* = p<0.0005; ns, not significant.

17

18 Figure S2  
 19

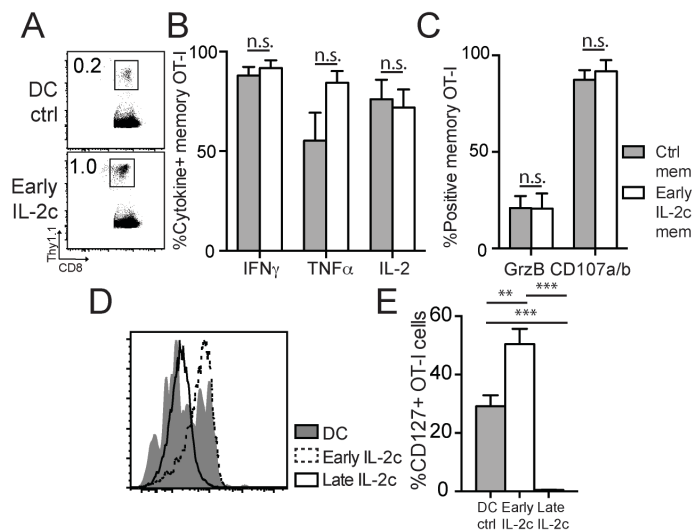

20  
 21  
 22 **Figure S2.**  $3 \times 10^4$  Thy1.1<sup>+</sup> WT OT-I cells were adoptively transferred into naïve Thy1.2<sup>+</sup> mice  
 23 and immunized with  $5 \times 10^5$  DC-Ova followed by Rat Ig or IL-2c on D1-3 (Early) post-DC  
 24 immunization. Splens were harvested at D70 and splenocytes were stimulated with Ova<sub>257</sub>  
 25 peptide for 5 hrs in the presence of Bfa. (A) Representative gating of memory OT-I cells. (B)  
 26 Percent of memory OT-I cells expressing IFN $\gamma$ , TNF $\alpha$ , or IL-2. (C) Same as (B) except GrzB  
 27 and CD107a/b expression. (D) Same adoptive transfer setup as (A-C) with additional D4-6 (late)  
 28 IL-2c treatment group. Expression of CD127 was measured on D7 post-DC immunization.  
 29 Representative histogram depicting relative CD127 from OT-I cells among treatment groups. (E)  
 30 Summary bar graphs (mean  $\pm$  SEM) of %CD127+ OT-I cells among treatment groups. Data are  
 31 representative of 2 independent experiments with at least n=5 mice/group. \* = p<0.05; \*\*\* =  
 32 p<0.0005.

33  
 34

35 Figure S3  
36

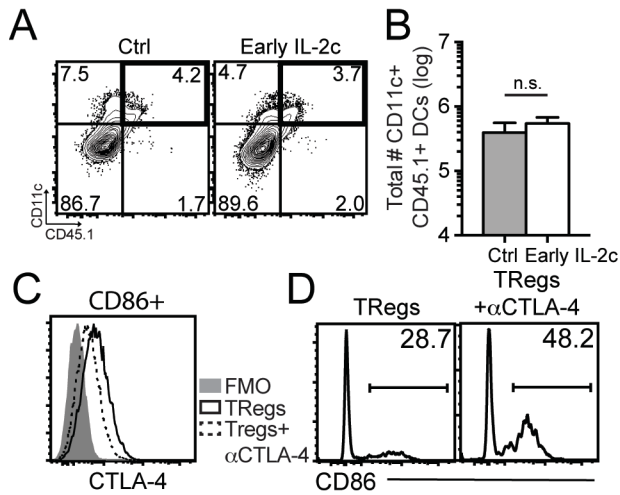

37  
38

39 **Figure S3.**  $3 \times 10^6$  LPS-matured CD11c<sup>+</sup> DCs from B16-flt3L inoculated CD45.1<sup>+</sup> B6 mice were  
40 adoptively transferred into naïve CD45.2<sup>+</sup> B6 recipients and subsequently administered Rat Ig or  
41 IL-2c for 2 days. Spleens were harvested and CD45.1<sup>+</sup> DC population were quantified from both  
42 groups. (A) Representative flow plot depicting CD45.1<sup>+</sup>CD11c<sup>+</sup> DC population. (B) Summary  
43 bar graph (mean  $\pm$  SEM) of total number of transferred DCs harvested from the spleen at 2 days  
44 post-immunization. (C) Treg cells were facs-sorted from FoxP3-GFP mice and incubated in a 1:2  
45 ratio with LPS-matured DCs in the presence of 20nM bafilamycin A with or without 300 $\mu$ g  
46  $\alpha$ CTLA-4 for 3 hours. Representative histogram plot depicting CTLA-4 binding of CD86 ligand.  
47 (D) Representative histogram plots depicting CD86 expression on DCs in Treg and  
48 Treg+ $\alpha$ CTLA-4 treatment wells. Data are representative of two independent experiments with at  
49 least 3 biological replicates. n.s. = not significant.

50

51 Figure S4

52

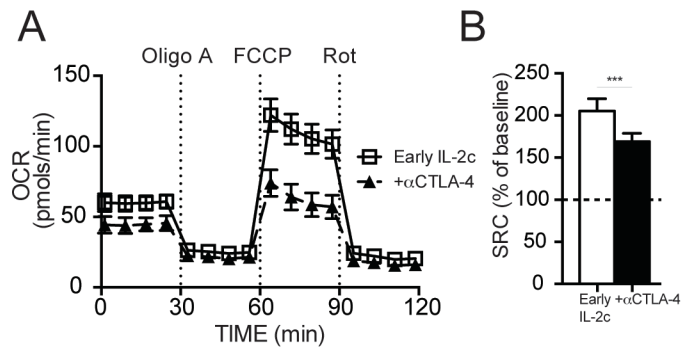

53

54

55 **Figure S4.**  $3 \times 10^4$  Thy1.1<sup>+</sup> OT-I cells were adoptively transferred into naïve Thy1.2<sup>+</sup> B6 mice  
56 and administered DC + IL-2<sub>c1-3</sub> or DC + IL-2<sub>c1-3</sub> + αCTLA-4 treatment. OT-I cells were purified  
57 from spleens at D6 post-DC immunization and assessed for metabolic function. (A) Time-course  
58 of oxygen consumption rate (OCR) in pmols/min from both treatment groups. (B) Same as (A)  
59 except summary (mean ± SEM) of spare respiratory capacity (SRC) in both treatment groups  
60 normalized to percent of baseline. Data are representative of two independent experiments with  
61 at least 5 biological replicates/experiment. \*\*\* = p<0.0005.
